# Supplementary material for: Association of Food Habits on Adolescents’ Mental Distress and Quality of Life: an Observational Study From Higher Secondary Schools of Pakistan
Source: Research Square preprint supplement (doi:10.21203/rs.3.rs-6242891/v1), 2025-05-07
Supplement: Supplementary file 1 [file 380cfecb6699abe1690f7008.docx]

**ASSOCIATION OF FOOD HABITS ON ADOLESCENTS’ MENTAL DISTRESS AND QUALITY OF LIFE: AN OBSERVATIONAL STUDY FROM HIGHER SECONDARY SCHOOLS OF PAKISTAN**

Khadija Muqadas1,#, Shahbaz Ahmad Zakki1,#,*, Ijaz ul Haq1, Ismail Qadri1, Azhar Mehmood1, Syed Hammad Abid1, Muhammad Subhan Nazar1, Muhammad Junaid1, Ayesha Umar Chaudhary1

#Authors contributed equally.

1 *Department of Public Health and Nutrition, The University of Haripur, Haripur, 22620, Khyber Pakhtunkhwa, Pakistan.*

**Running Head:** "Food Habits and Adolescent Health"

*Corresponding Authors

Shahbaz Ahmad Zakki, PhD

Assistant Professor,

Department of Public Health and Nutrition,

The University of Haripur, Haripur, *22620,* Khyber Pakhtunkhwa, Pakistan

[sazakki@uoh.edu.pk](mailto:sazakki@uoh.edu.pk)

Tel # +92-333-6362383

**Supplementary Data**

**Table S1**

The table showed adjusted odds ratios (AOR) and 95% confidence intervals (CI) for a variety of health and well-being indicators including physical health, psychological health, social relationships, environment, overall quality of life (QOL), overall general health, depression, anxiety, stress, and food habits. The AOR values describe the statistical probability of various outcomes or relationships, but the confidence interval (CI) represents the accuracy of these estimations.

**Table S2**

For a variety of indicators, such as physical and mental health, relationships with others, the environment, overall quality of life (QOL), overall general health, depression, anxiety, stress, and eating habits, table showed indicates the adjusted odds ratios (AOR) and the corresponding 95% confidence intervals (CI). The degree of uncertainty around these estimates is represented by the CI, as the AOR values show the likelihood of events or associations. These relationships' statistical significance is evaluated by the *p*-values.

**Table S1**

| **Indicators** | **AOR (95% CI)** | ***p-value*** |
| --- | --- | --- |
| Physical health | 0.986 (0.973-1.000) | 0.043* |
| Psychological health | 1.013 (0.999-1.027) | 0.070 |
| Social relation | 1.001 (0.991-1.012) | 0.836 |
| Environment | 0.970 (0.957-0.984) | <0.001*** |
| Overall QOL | 1.001 (0.995-1.008) | 0.653 |
| Overall general health | 1.005 (0.999-1.011) | 0.128 |
| Depression | 0.775 (0.661-0.908) | 0.002** |
| Anxiety | 0.866 (0.730-1.028) | 0.100 |
| Stress | 1.071 (1.071-1.372) | 0.002** |
| Food habit | 0.968 (0.951-0.985) | <0.001*** |

*p < 0.05, ** p < 0.01, *** p < 0.001

AOR values larger than 1 indicate a positive relationship between the indicators and the outcomes, whereas values below 1 indicate an adverse association.

**Table S2**

| **Indicators** | **AOR (95% CI)** | ***p-value*** |
| --- | --- | --- |
| Physical health | 1.011 (0.995-1.027) | 0.171 |
| Psychological health | 0.992 (0.976-1.009) | 0.359 |
| Social relation | 1.014 (1.000-1.027) | 0.046* |
| Environment | 1.005 (0.988-1.023) | 0.537 |
| Overall QOL | 1.007 (1.000-1.015) | 0.060 |
| Overall general health | 1.006 (0.998-1.014) | 0.128 |
| Depression | 0.998 (0.965-1.033) | 0.926 |
| Anxiety | 1.008 (0.972-1.045) | 0.672 |
| Stress | 1.010 (0.984-1.037) | 0.444 |
| Food habit | 0.982 (0.961-1.003) | 0.100 |

*p < 0.05

AOR values larger than one indicates a positive relationship between the indicators and the outcomes, whereas values less than one indicate a negative relationship.
